# Supplementary material
Source: MDPI journal article supplement (https://www.mdpi.com/2073-4344/8/1/3)
Supplement: s1 [file s1]

Supplementary Materials: Influence of the Sodium Impregnation Solvent on the Deactivation of Cu/FER-Exchanged Zeolites Dedicated to the SCR of NOx with NH3

**Marie-Laure Tarot 1 Mathias Barreau 1 Daniel Duprez 1 Vincent Lauga 2 Eduard Emil Iojoiu 2 Xavier Courtois 1,* and Fabien Can 1,***

1 CNRS, UMR 7285 Institut de Chimie des Milieux et Matériaux de Poitiers (IC2MP), Université de Poitiers, 4 rue Michel Brunet—TSA 51106—86073 Poitiers CEDEX 9, France; marie.laure.tarot@univ-poitiers.fr (M.-L.T.); mathias.barreau@univ-poitiers.fr (M.B.); daniel.duprez@univ-poitiers.fr (D.D.)

2 Renault Trucks—Volvo Group Trucks Technology—Powertrain Engineering Lyon, 99 route de Lyon—69806 Saint-Priest CEDEX, France; vincent.lauga@volvo.com (V.L.); eduard.emil.iojoiu@volvo.com (E.E.I.)

***** Correspondence: xavier.courtois@univ-poitiers.fr (X.C.); fabien.can@univ-poitiers.fr (F.C.);
Tel.: +33-519453994 (X.C.); +33-549453997 (F.C.)

1. Characterization of the host FER zeolite

1.1 XRD characterization

XRD analysis of ferrerite zeolite samples were performed over fresh and hydrotreated materials at 600°C and 750°C (Figure S1). No evolution of the diffraction peaks are evidenced.


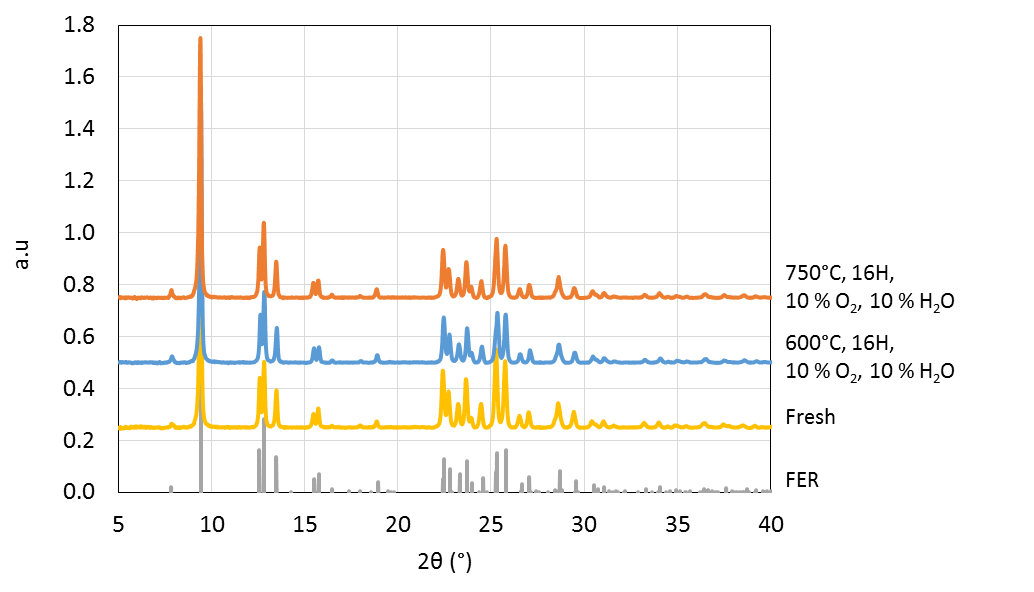


**Figure S1.** XRD patterns of fresh (yellow) and hydrotreated zeolite for 16 hours at 600°C (blue) and 750°C (orange). XRD JCPDS file 98-007-5475 of ferrierite is referenced in grey.

1.2 FT-IR characterization: T-O-T band

The Infrared structural bands of T-O-T vibrations are reported in Figure S2, depending on the hydrothermal treatment temperature.

The perturbed zeolite skeleton vibrations are shifted from 1096 cm-1 for the fresh zeolite to 1103 and 1104 cm-1 after hydrothermal ageing for 16 hours at 600°C and 700°C, respectively. These results indicate a small dealumination of the zeolite.


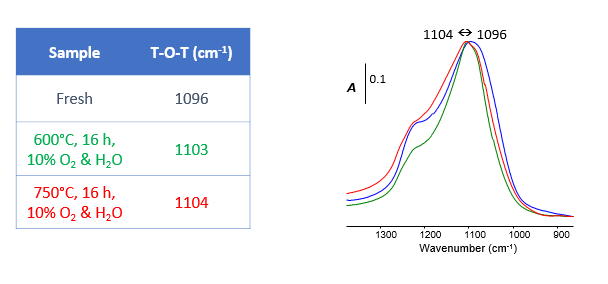


**Figure S2.** T-O-T bands obtained with zeolite before (blue) and after hydrotreatment at 600 °C (green) and 750 °C (red) during 16 hours (samples dilluted in KBr).

2. Copper and sodium containing materials

2.1 XRD characterization

XRD patterns of sodium free copper-exchanged materials were recorded for 2.8 wt% and 6.1 wt% Cu (Figure S3 and Figure S4, respectively). Copper was not detected over Cu2.8/FER (Figure S3), whereas broad diffraction peaks appeared on the diffractogram of Cu6.1(W-EtOH)/FER near 2θ = 35.5 and 38.7, which are attributed to CuO (Figure S4).

XRD patterns of hydrotreated samples containing sodium (19 000-20 300 ppm) impregnated in water were also depicted in Figure S3 and Figure S4 for Cu2.8/FER and Cu6.1(W)/FER, respectively. XRD patterns reveal the apparition of CuO for both samples, with higher intensity of the CuO peaks for Cu6.1(W)/FER. To the opposite, no CuO peaks evolution was denoted when Na was impregnated in EtOH (patterns not shown).


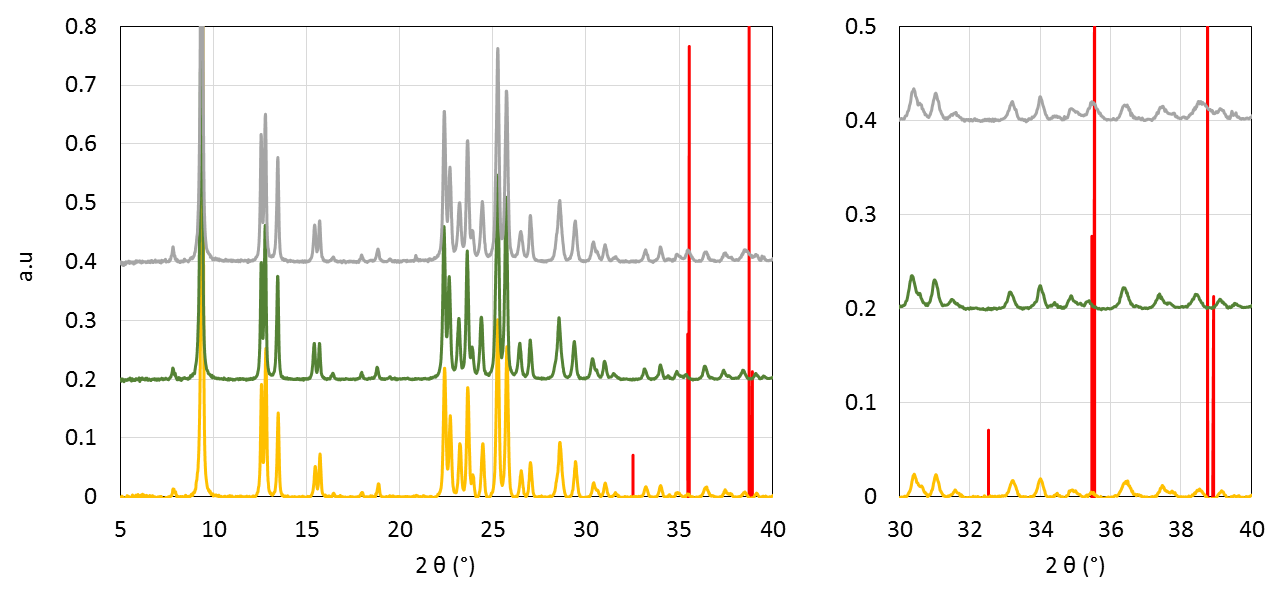


**Figure S3.** XRD patterns of fresh FER (yellow), sodium free Cu2.8/FER (green) and Cu2.8(w)/FER with 19 000 ppm Na impregnated in water (grey). XRD JCPDS file 98-009-2368 of CuO is referenced in red.


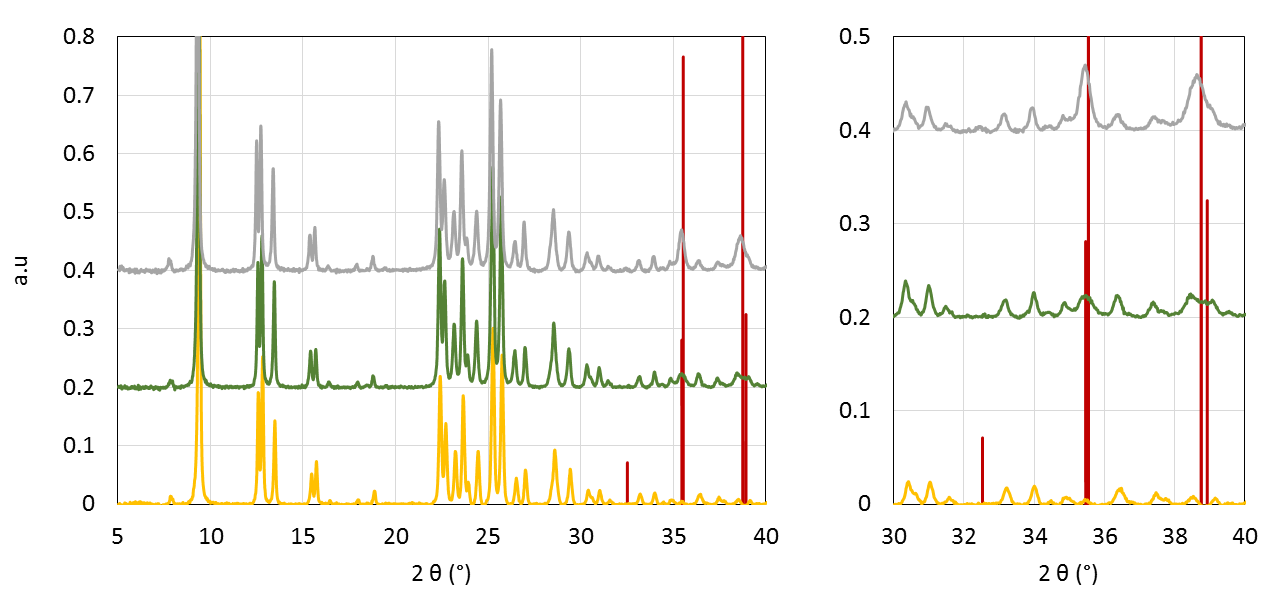


**Figure S4.** XRD patterns of fresh FER (yellow), sodium free Cu6.1/FER (green) and Cu6.1(w)/FER with 20 300 ppm Na impregnated in water (grey). XRD JCPDS file 98-009-2368 of CuO is referenced in red.

2.2 Ammonia oxidation behaviour depending on the Na loading and impregnation solvent.


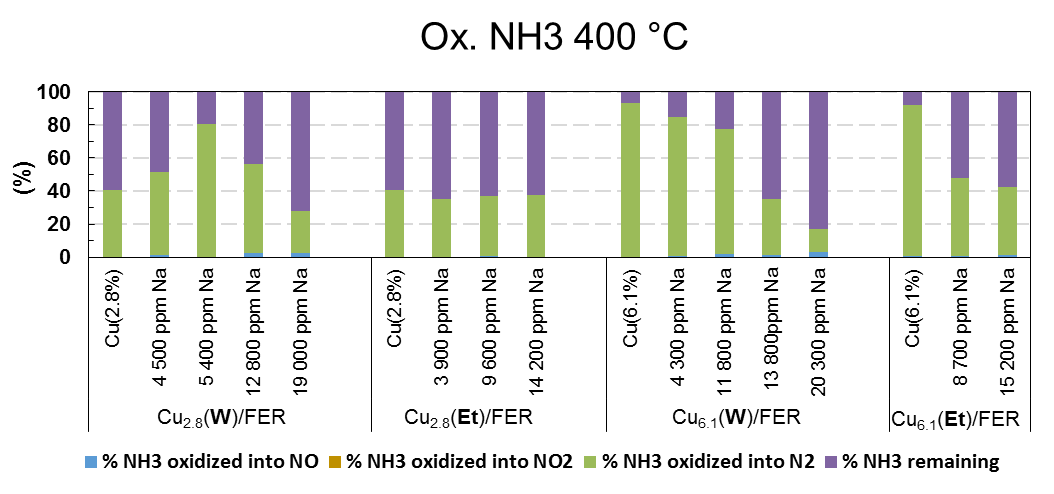


**Figure S5.** Effect of Na loading on NH3 oxidation at 400°C over Cu2.8/FER and Cu6.1/FER samples depending on the Na loading impregnated in water (W) or ethanol (EtOH).

2.3 Temperature programmed reduction by hydrogen (H2-TPR).


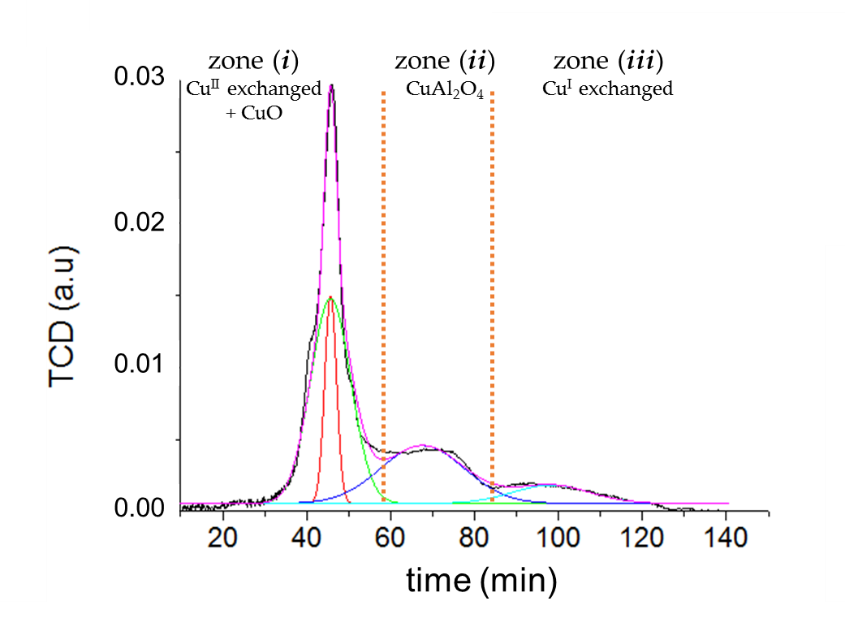


**Figure S6.** H2-TPR profile deconvolution over Cu2.8/FER with 19 000 ppm of Na content impregnated in water.

For the whole studied sample, the total hydrogen consumption corresponds to the total CuII reduction in Cu0. To access to the different copper species over the Cu exchanged zeolite, with or without Na content, H2-TPR profiles were deconvoluted in three separate zones (Figure S6). Zone (i) corresponds to both CuO reduction into metallic copper and CuII exchanged species reduction into CuI; zone (*ii*) is related to copper aluminate reduction into metallic copper; zone (*iii*) corresponds to CuI exchanged species resulting from the reduction of CuII exchanged compounds.

The H2 consumption related to the peak centred at around 950°C (attributed to Cu+ in exchanged position, zone (*iii*)) was deduced to the integration of the broad low reduction peak(s) (zone (*i*)), to assess to the coper exchanged amount accordingly to the following equations:

|  |  |
| --- | --- |
|  |  |

© 2017 by the authors; licensee MDPI, Basel, Switzerland. This article is an open access article distributed under the terms and conditions of the Creative Commons Attribution (CC BY) license (http://creativecommons.org/licenses/by/4.0/).
